# Supplementary material
Source: HighWire-hosted journal article supplement (https://bmjopenquality.bmj.com/content/11/4/e001916)

### Medicines Optimisation pathway following paediatric virtual outpatient appointments

High-level pathway mapping from when a new drug is prescribed at a virtual outpatient appointment to when it is received via post or courier. Created in collaboration with MDT colleagues from across 3 hospitals.

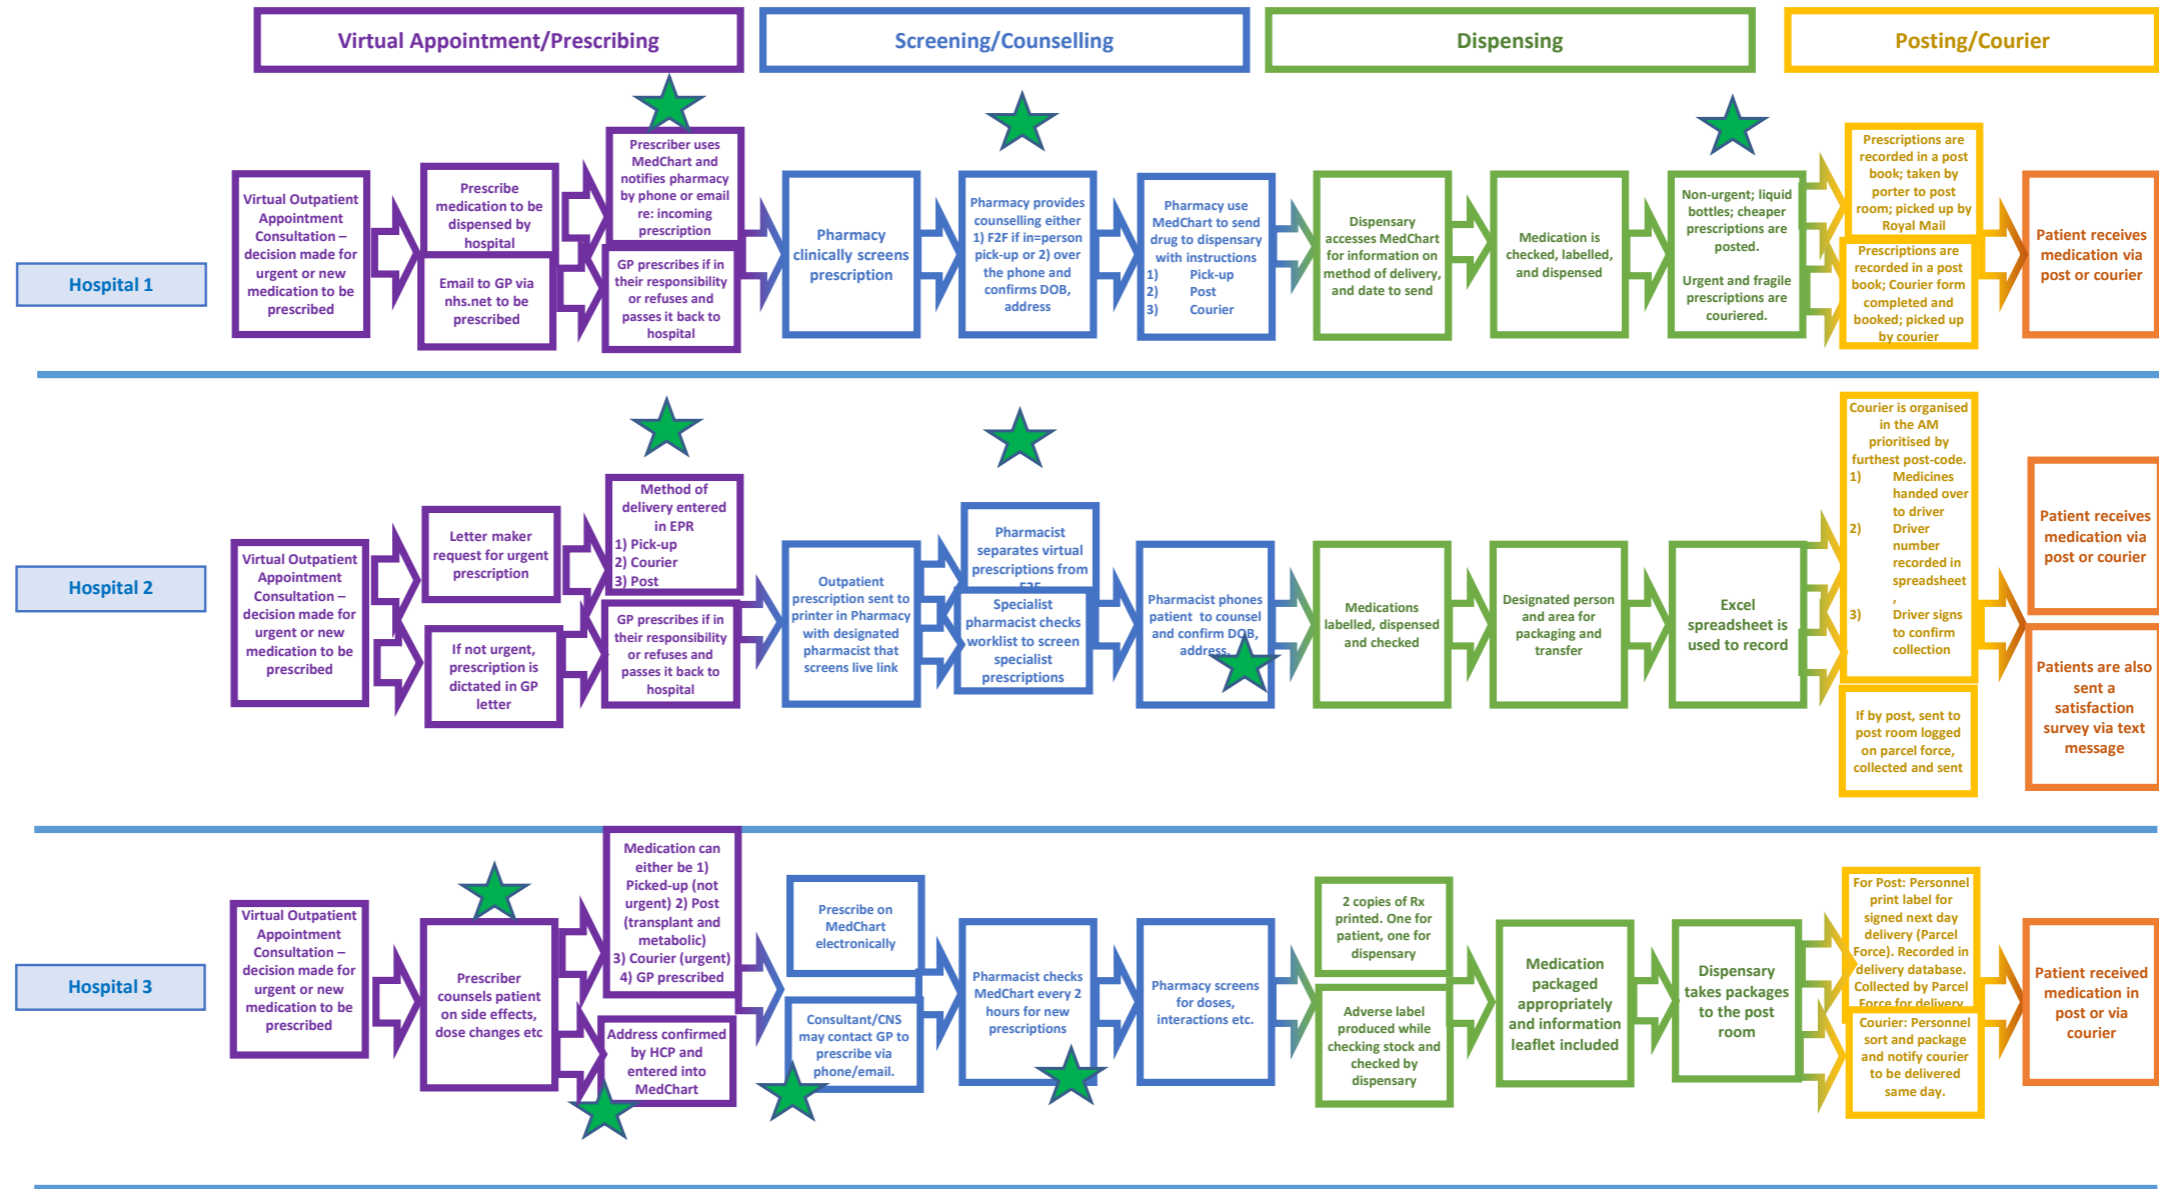

Supplement: inline-supplementary-material-1 [file inline-supplementary-material-1.pdf]
